# Supplementary material for: Icariin-Functionalized Nanodiamonds to Enhance Osteogenic Capacity In Vitro
Source: PubMed Central journal article supplement (PMC7589593; doi:10.3390/nano10102071), 2020-10-20
Supplement: nanomaterials-10-02071-s001.pdf [file nanomaterials-10-02071-s001.pdf]

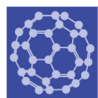

## Supplementary Materials

## Icariin-Functionalized Nanodiamonds to Enhance Osteogenic Capacity In Vitro

Somang Choi <sup>1,†</sup>, Sung Hyun Noh <sup>2,†</sup>, Chae Ouk Lim <sup>3,†</sup>, Hak-Jun Kim <sup>1</sup>, Han-Saem Jo <sup>4</sup>, Ji Seon Min <sup>4</sup>, Kyeongsoon Park <sup>4,\*</sup> and Sung Eun Kim <sup>1,\*</sup>

<sup>1</sup> Department of Orthopedic Surgery and Rare Diseases Institute, Korea University Guro Hospital, #148, Gurodong-ro, Guro-gu, Seoul 08308, Republic of Korea; chlthakd1029@naver.com (S.C.), dakjul@korea.ac.kr (H.-J.K.)

<sup>2</sup> Department of Neurosurgery, National Health Insurance Service Ilsan Hospital, #100, Ilsan-ro, Ilsan-donggu, Goyang-si, Gyeonggi-do 10444, Republic of Korea; ulove07@nhimc.or.kr

<sup>3</sup> Department of Orthopedic Surgery, College of Medicine, Korea University, Anam-dong, Seongbuk-gu, Seoul 02841, Republic of Korea; lco20@hanmail.net

<sup>4</sup> Department of Systems Biotechnology, Chung-Ang University, Anseong-si, Gyeonggi-do 17546, Republic of Korea; luchiatkfkd@naver.com (H.-S.J.); minjiseon310@gmail.com (J.S.M.)

<sup>†</sup> S.C., S.H.N. and C.O.L. contributed equally to this work

<sup>\*</sup> Correspondence: kspark1223@cau.ac.kr (K.P.); sekim10@korea.ac.kr (S.E.K.); Tel.: +82-31-670-3357 (K.P.); +82-2-2626-1999 (S.E.K.)

**Table S1.** Real-time PCR primer sequences of the osteogenic-related genes.

| Gene   | Primer (Forward)                     | Primer (Reverse)                     |
|--------|--------------------------------------|--------------------------------------|
| ALP    | GTG GAA GGA GGC AGA ATT GAC CA       | AGG CCC ATT GCC ATA CAG GAT GG       |
| RUNX2  | ATG GCA TCA AAC AGC CTC TTC<br>AGC A | CGT GGG TTC TGA GGC GGG ACA<br>CC    |
| COL1A1 | CCC TGG AAA GAA TGG AGA TG           | CCA CTG AAA CCT CTG TGT CC           |
| OPN    | GAG GGC TTG GTT GTC AGC              | CAA TTC TCA TGG TAG TGA GTT<br>TTC C |

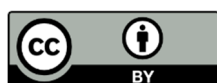

© 2020 by the authors. Licensee MDPI, Basel, Switzerland. This article is an open access article distributed under the terms and conditions of the Creative Commons Attribution (CC BY) license (<http://creativecommons.org/licenses/by/4.0/>).
